# Supplementary material
Source: PubMed Central journal article supplement (PMC154367)
Supplement: pnas_0835746100_11.pdf [file pnas_0835746100_11.pdf]

Supporting information for Imamizu *et al.* (2003) *Proc. Natl. Acad. Sci. USA*,  
10.1073/pnas.0835746100.

Table 2. Average velocity and acceleration of cursor, mouse/hand, and target during test period and error-equalized baseline period

|                  | Cursor             |                                     | Mouse/hand          |                                      | Target             |                                     |
|------------------|--------------------|-------------------------------------|---------------------|--------------------------------------|--------------------|-------------------------------------|
|                  | Velocity,<br>°/sec | Acceleration,<br>°/sec <sup>2</sup> | Velocity,<br>cm/sec | Acceleration,<br>cm/sec <sup>2</sup> | Velocity,<br>°/sec | Acceleration,<br>°/sec <sup>2</sup> |
| Rotated mouse    |                    |                                     |                     |                                      |                    |                                     |
| Test             | 6.5                | 431.2                               | 1.8                 | 210.5                                | 5.4                | 190.6                               |
| Baseline         | 9.8                | 758.4                               | 2.7                 | 431.0                                | 9.6                | 541.4                               |
| <i>F</i> (1,6) * | 63.7               | 79.3                                | 63.7                | 79.3                                 | 36.1               | 22.4                                |
| <i>P</i> < *     | 0.0002             | 0.0001                              | 0.0002              | 0.0001                               | 0.001              | 0.003                               |
| Velocity mouse   |                    |                                     |                     |                                      |                    |                                     |
| Test             | 6.1                | 252.8                               | 2.3                 | 153.3                                | 5.3                | 189.6                               |
| Baseline         | 11.7               | 1014.9                              | 3.2                 | 283.5                                | 13.1               | 931.7                               |
| <i>F</i> (1,6) * | 150.7              | 170.9                               | 113.6               | 79.8                                 | 85.9               | 56.3                                |
| <i>P</i> < *     | 0.0001             | 0.0001                              | 0.0001              | 0.0001                               | 0.0001             | 0.0001                              |

\* *F* and *P* values indicate significance of difference in average velocity and acceleration between test and baseline periods according to a repeated-measures ANOVA.
